# Supplementary material
Source: Springer Nature journal article supplement (https://www.springermedizin.de/resource/supplementary/13075_2013_4272_MOESM5_ESM.pdf/9696314)

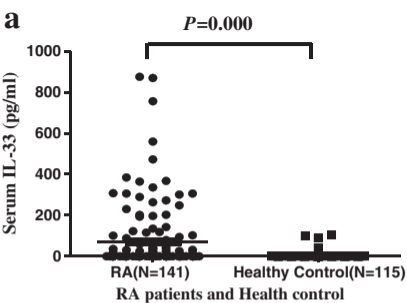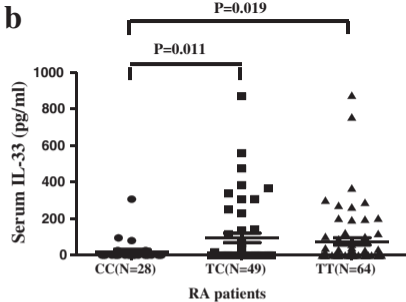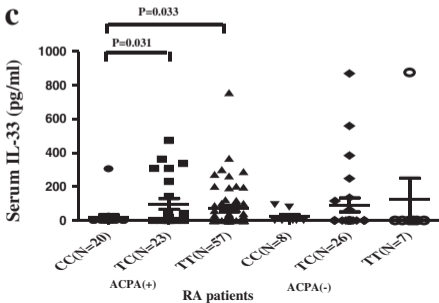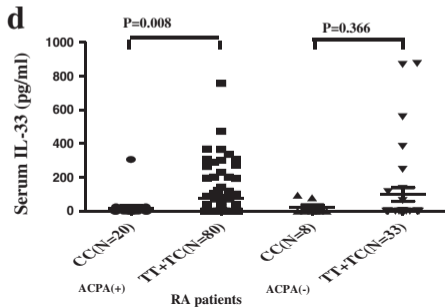

Supplement: MOESM5 [file 9696314]
